1 **Effects of host plants nutrient on the nutrient in *Bradysia cellarum* and**  
2 ***Bradysia impatiens***

3

4 Yuping Gou, Peter Quandahor, Yanxia Zhang, Changzhong Liu\*

5

6 Biocontrol Engineering Laboratory of Crop Diseases and Pests of Gansu Province.

7 College of Plant Protection, Gansu Agricultural University, No. 1 Yingmen village, Anning

8 District, Lanzhou, 730070, Gansu Province, P. R. China.

9

10

11

12

13

14

15

16

17 \* Correspondence: Changzhong Liu. E-mail: liuchzh@gsau.edu.cn. Telephone: +86-931-763134.

18

19

20

21

22

23

## 24 **Abstract**

25           The chive maggots *Bradysia cellarum* the fungus gnats *Bradysia impatiens* are two main  
26 root pests of plants. They can coexist on same host plants and have become devastating pests on  
27 liliaceous crops and edible fungi. Their growth and development are affected by nutrients of their  
28 host plants. We studied the effects of different host plant nutrients on the nutrient contents of these  
29 two *Bradysia* species. We assayed the nutrients in the roots of chive, board bean (B-bean), lettuce,  
30 cabbage, wild cabbage (W-cabbage) and pepper, and analysed the nutrient content of the two  
31 *Bradysia* species after three continuous generations of feeding on these different host plants. There  
32 chive and B-bean had higher contents of protein, free amino acid and starch than in other host  
33 plants. Soluble sugar, fat and protein contents were significantly higher in both *Bradysia* species  
34 when they were reared on chive and B-bean than when reared on cabbage, lettuce, W-cabbage and  
35 pepper. Our study provides a reference for further studies on the host range of the two *Bradysia*  
36 species, as well as knowledge for consideration in field crop rotations.

37

38 **Keywords:** *Bradysia cellarum*, *Bradysia impatiens*, host plant nutrient, insect nutrient

39

## 40 **Introduction**

41           The chive maggots *Bradysia cellarum* Frey, 1948 (= *Bradysia odoriphaga* Yang and  
42 Zhang, 1985) and the fungus gnats *Bradysia impatiens* Johnnsen, 1912 (= *Bradysia difformis* Frey,  
43 1948), are two main root insect pests which belong to the family Diptera and the genus Sciaridae  
44 [1, 2]. They may coexist on the same host plants and have become devastating pests on liliaceous  
45 crops and edible fungi [3]. The larvae of these species attack their host plants by chewing or

46 stripping plant roots, especially the young and developing root hairs and stems of seedlings, and  
47 leading to losses in crop production and hindering agricultural productivity as well as farmers'  
48 income [2, 4]. In outdoor fields, the two *Bradysia* species occur with similar regularities and  
49 outbreak in spring and autumn, while populations decline in summer [4]. The chive maggots *B.*  
50 *cellarum* heavily attacks chive, onion, garlic, cabbage and watermelon seedlings [5-8]. The fungus  
51 gnats *B. impatiens* [9] also causes damages to chive, lily, green onion, garlic, B-bean, cabbage,  
52 butterfly orchid and jonquil [10-13], which was first recorded on the edible mushroom in Yunnan,  
53 China in 2009 [14, 15].

54         Successful growth, development, and reproduction of plant-feeding insects depend on  
55 finding suitable host plants and obtaining adequate nutrition from them. It was found that there  
56 were significant differences among different host plants for the developmental duration, life  
57 longevity and population trend index of the fruit fly (*Bactrocera*), indicating that the fly's  
58 population was influenced by host plant nutrition [16]. Protein, amino acid, soluble sugar and  
59 starch are the main nutrients in plants, which have a great influence on the growth, reproduction,  
60 survival rate and spawning of herbivores [17]. For example, higher soluble sugar content in wheat  
61 plants influenced a higher intrinsic rate of increase, shorter development time of the nymph and  
62 fecundity in the aphid species *Rhopalosiphum padi* L [18]. The soluble sugar content in the plant  
63 was negatively correlated with aphid resistance but positively correlated with fecundity [19, 20].  
64 However, it was reported that the total carbohydrate contents of different plants had no significant  
65 effect on the growth and development of the beet armyworm *Spodoptera exigua* (Hubner), but was  
66 positively correlated with its oviposition and larval stage development [21]. Starch is a kind of  
67 polysaccharide in plant and plays an important role in storing energy. The starch content in a plant  
68 can be affected by insect attack, for instance, the starch content of wheat showed a decreasing

69 trend after it was attacked by *Rhyzopertha dominica* (Fabricius) [22]. The nutrient content of host  
70 plants may also be one of the important factors that determines the host plant selection by insects  
71 [22].

72         Adults of *B. cellarum* and *B. impatiens* do not feed, so their main nutrients are accumulated  
73 and come from larval stages. Research on the biology [23], prevention and treatment [24],  
74 morphology [6] and sex pheromones [25] of *B. cellarum* and *B. impatiens* have attracted much  
75 more attention in recent years. However, the effects of host plant nutrients on the nutrient contents  
76 of the two *Bradysia* species have not been reported. Since different host plants have different  
77 nutrients and could differently affect the development of herbivorous insects, clear knowledge of  
78 the nutrient contents in different host plants and their correlations with insect feeding and growth  
79 is an important information for preventing and controlling insect pests of crops.

80         In the present study, we selected six host plants of *B. cellarum* and *B. impatiens*, including  
81 chive (*Allium tuberosum*), B-bean (*Vicia faba*), lettuce (*Lactuca sativa*), cabbage (*Brassica*  
82 *pekinensis*), wild cabbage (*Brassica oleracea*) and pepper (*Capsicum annuum*), and determined  
83 the contents of protein, free amino acid, soluble sugar and starch in the roots of these six host  
84 plants. Additionally, we also measured these nutrient contents such as soluble sugar, glycogen,  
85 total fat, neutral fat and protein in these two *Bradysia* species after they were fed on these host  
86 plants for three continuous generations. The aim of this study was to explore the potential effects  
87 of host plant nutrients on the nutrient content of the two *Bradysia* species and to provide a reference  
88 for further studies on their host plant range, as well as knowledge for consideration in field crop  
89 rotations.

90

## 91 **Materials and methods**

### 92 **Host plants**

93           Seeds of chive (*Allium tuberosum*), B-bean (*Vicia faba*), lettuce (*Lactuca sativa*), cabbage  
94 (*Brassica pekinensis*), W-cabbage (*Brassica oleracea*) and pepper (*Capsicum annuum*) were sown  
95 in the laboratory of Gansu Agricultural University (36°5'20" N, 103°41'54" E), Lanzhou, China.  
96 Each seeds planted three pots. Two months after germination, the stems of each host plants were  
97 collected to feed larvae of the two *Bradysia* species. Plant roots were extracted and cleaned with  
98 water. Their nutrient contents were then determined individually.

### 99 **Insects**

100           Populations of *B. cellarum* and *B. impatiens* were collected from chive fields in Gangu  
101 county (34°44'44" N, 105°20'13" E), Gansu Province, China. Larvae were reared with stems of  
102 each tested host plants in moisturized petri dishes [26-27] for 3 continuous generations before  
103 being used in experiments.

### 104 **Determination of nutrients in tested plants**

105           The roots from three pots of the six host plants were used to determine the contents of  
106 soluble protein, free amino acid, soluble sugar and starch separately. Each experiment was  
107 repeated 3 times. The protein content was measured using the Bradford assay method [28]. The  
108 optical density (OD) values were measured at 595 nm, and the protein contents were calculated  
109 based on the standard curve of BSA (Sangon biotech, Shanghai, China). The free amino acid  
110 content was detected by the ninhydrin method [28]. The OD value was measured at 580 nm, and  
111 calculated based on the standard curve of leucine. The soluble sugar content was determined using

112 the anthrone colorimetry method and calculated based on the standard curve of D-glucose (Sangon  
113 biotech, Shanghai, China) [28].

## 114 **Carbohydrate determination in the insect body**

115 The soluble sugar and the glycogen contents of the two *Bradysia* species reared with  
116 different host plants were determined using the methods of Lv et al [29]. Firstly, we transferred  
117 160  $\mu\text{L}$  of the homogenate suspension into a 2 mL centrifuge tube and mixed it with 20  $\mu\text{L}$  of 20%  
118 sodium sulphate and 1500  $\mu\text{L}$  of a chloroform/methanol solution (1:2 v/v). Then, this mixture was  
119 centrifuged at 10,000 rpm for 15 min at 4 °C. Hereafter, this top mixture solution was treated as a  
120 premeasured solution.

121 In order to determine the soluble sugars of *Bradysia* larvae, firstly, we transferred 150  $\mu\text{L}$   
122 suspension of the premeasured solution into a 1.5 mL centrifuge tube and then mixed it with 10  
123  $\mu\text{L}$  ddH<sub>2</sub>O and 240  $\mu\text{L}$  anthrone (1.42 g/L). After which the mixture was first incubated for 10 min  
124 at 25 °C and then incubated in boiling water for another 10 min, followed by cooling to room  
125 temperature. The mixture was then transferred into a 96-pore coated plate. Finally, the OD value  
126 was determined at 620 nm wavelength, and the soluble sugar content was calculated based on the  
127 standard curve of D-glucose (Sangon biotech, Shanghai, China).

128 To determine the glycogen of *Bradysia* larvae, similarly, the remaining suspension of the  
129 premeasured solution was transferred to another centrifuge tube. The precipitant was mixed with  
130 400  $\mu\text{L}$  of 80% methanol and homogenized in an ultrasonic cleaning apparatus for 5-10 min, after  
131 which the homogenate was centrifuged again at 10,000 rpm for 10 min at 4 °C. Then, the new  
132 suspension was mixed with anthrone solution, incubated for 10 min under room temperature, and  
133 then in boiling water for another 10 min. the mixture was then transferred into a 96-pore coated  
134 plate. The OD value was measured at 620 nm, and the glycogen content was calculated based on

135 the standard curve of D-glucose. Each experiment was repeated three times and each time with  
136 fifteen third instar larvae of *B. cellarum* and *B. impatiens*.

### 137 **Total fat and neutral fat determination in the insect body**

138 The total fat and neutral fat of *Bradysia* larvae after feeding on different host plants were  
139 determined using the methods of Lv et al [29]. To determine total fat content, 100  $\mu$ L of the  
140 premeasured solution was transferred to a 1mL centrifuge tube, then dried at 90 °C until all the  
141 solvents were completely evaporated. After that, 10  $\mu$ L of 98% sulphuric acid and 190  $\mu$ L of  
142 vanillin solution (1.2 g/L) were added to the tube. After 15 min of incubation under room  
143 temperature, the liquid mixture was transferred into a 96-pore coated plate. The OD value of total  
144 fat content was determined at 525 nm and calculated based on the standard curve of triolein  
145 (Sigma, St. Louis, MO, USA). The experiment was repeated three times and each time with fifteen  
146 third instar *Bradysia* larvae.

147 For the detection of neutral fat in the larvae of the two *Bradysia* species, firstly,  
148 approximately 150  $\mu$ L of the premeasured solution was transferred into a 1.5 mL centrifuge tube  
149 and then dried at 90 °C until all the solvents were completely evaporated. Following this, 1 mL of  
150 chloroform was added to dissolve the solution content and then centrifuged at 10,000 rpm for 15  
151 min at 4 °C. After which 100  $\mu$ L of the new suspension was treated in the same procedure as for  
152 total fat detection. The OD value of neutral fat was measured at 525 nm, and its content was  
153 calculated based on the standard curve of triethylhexanoin (Aladdin, Shanghai, China). The  
154 experiment was repeated three times and each time with fifteen 3th instar *Bradysia* larvae.

### 155 **Protein determination in insect body**

156 The protein content of the two *Bradysia* species in the different treatments was determined  
157 referring to the method of Lv et al [29]. About 20  $\mu$ L of the homogenate suspension was transferred

158 into a 96-well plate and then mixed with 200  $\mu$ L of Coomassie brilliant blue G-250 dye (Bradford  
159 assay) for 15-20 min. The OD values were measured at 595 nm, and the protein contents were  
160 calculated based on the standard curve of BSA (Sangon biotech, Shanghai, China). The experiment  
161 was repeated three times with fifteen third instar larvae of *Bradysia* each time.

## 162 **Statistical analysis**

163 Microsoft Excel 2016 was used to analyse data and plot figures. Proc Means program  
164 (SPSS 19.0, IBM, Armonk, NY, USA) was used for one-way analysis of variance [30] and  
165 Tukey'S HSD was used to compare the differences among variables [31].

166

## 167 **Results**

### 168 **Nutrient contents in roots of different host plants**

169 The root protein content in the 6 tested host plants are shown in Figure 1A. The B-bean  
170 had the highest content (4.49 mg/g), followed by chive (3.87 mg/g), pepper (2.34 mg/g), W-  
171 cabbage (1.99 mg/g), lettuce (1.91 mg/g) and cabbage (1.61 mg/g). The protein contents in B-bean  
172 and chive were significantly ( $P < 0.05$ ) higher than those of the other 4 host plants (Fig 1A).

173 Free amino acid contents in the order from high to low were 0.20 mg/g in B-bean, 0.17  
174 mg/g in chive, 0.11 mg/g in W-cabbage, 0.09 mg/g in pepper, 0.08 mg/g in lettuce and 0.07mg/g  
175 in cabbage (Fig 1B). The roots soluble sugar content in the 6 tested host plants were 0.85 mg/g in  
176 chive, followed by 0.61 mg/g in W-cabbage, 0.58 mg/g in B-bean, 0.56 mg/g in cabbage, 0.51  
177 mg/g in pepper and 0.42 mg/g in lettuce (Fig 1C). The highest starch content among the tested host  
178 plants occurred in the roots of B-bean (5.57 mg/g), while the lowest starch content occurred in the  
179 roots of pepper (2.23 mg/g) (Fig 1D). The roots starch content of other host plants were 5.18 mg/g



180 of chive, 3.15 mg/g of W-cabbage, 3.02 mg/g of cabbage and 2.28 mg/g of lettuce. The starch  
181 content was significantly ( $P < 0.05$ ) higher in the roots of B-bean and chive than those of other 4  
182 host plants.

183 **Fig 1. Nutrient contents in roots of host plant.** A: Protein content; B: Free amino acid content;  
184 C: Soluble sugar content; D: Starch content. Different small letters indicate significant difference  
185 at the 0.05 level among treatments of different host plants (Tukey's HSD).

186

### 187 **Soluble sugar contents in *B. cellarum* and *B. impatiens***

188 Soluble sugar contents of *B. cellarum* and *B. impatiens* reared on the six host plants are  
189 showed in Fig 2. We found that soluble sugar content of *B. cellarum* reared on chive was the  
190 highest (8.76  $\mu\text{g}/\text{mg}$ ). This was followed by 7.57  $\mu\text{g}/\text{mg}$ , 7.53  $\mu\text{g}/\text{mg}$  and 6.38  $\mu\text{g}/\text{mg}$  if they were  
191 reared on lettuce, B-bean and W-cabbage, respectively. The soluble sugar contents were even  
192 lower when reared on pepper (5.91  $\mu\text{g}/\text{mg}$ ) and cabbage (5.78  $\mu\text{g}/\text{mg}$ ). However, the highest  
193 soluble sugar content of *B. impatiens* occurred on B-bean (9.13  $\mu\text{g}/\text{mg}$ ), followed by chive (8.95  
194  $\mu\text{g}/\text{mg}$ ), lettuce (7.97  $\mu\text{g}/\text{mg}$ ), W-cabbage (7.34  $\mu\text{g}/\text{mg}$ ) and cabbage (5.68  $\mu\text{g}/\text{mg}$ ). Moreover, the  
195 soluble sugar content of *B. impatiens* was the lowest when reared on pepper (4.93  $\mu\text{g}/\text{mg}$ ). There  
196 were significant differences in the soluble sugar contents between *B. cellarum* and *B. impatiens*  
197 when fed on B-bean and pepper ( $P < 0.05$ ). We also found that *B. cellarum* and *B. impatiens*  
198 obtained higher soluble sugar contents when fed on chive, B-bean and lettuce compared with when  
199 fed on cabbage, W-cabbage, and pepper.

200 **Fig 2. Soluble sugar content in bodies of *B. cellarum* and *B. impatiens*.** Values are the means  $\pm$   
201 standard error. Different lowercase letters indicate significant differences between two *Bradysia*  
202 species on different host plants by Tukey's HSD ( $P < 0.05$ ); while the different uppercase letters  
203 represent significant differences between two *Bradysia* species on same host plants by Tukey's  
204 HSD ( $P < 0.05$ ).

### 205 **Glycogen contents in *B. cellarum* and *B. impatiens***

206 The glycogen contents of *B. cellarum* and *B. impatiens* across the various host plants are  
207 presented as Fig 3. The glycogen content of *B. cellarum* was the highest reared on lettuce (6.37  
208  $\mu\text{g}/\text{mg}$ ), followed by board bean (5.36  $\mu\text{g}/\text{mg}$ ), chive (4.44  $\mu\text{g}/\text{mg}$ ), W-cabbage (4.43  $\mu\text{g}/\text{mg}$ ), and  
209 pepper (3.83  $\mu\text{g}/\text{mg}$ ), while the lowest occurred on cabbage (3.34  $\mu\text{g}/\text{mg}$ ). Glycogen contents of  
210 *B. impatiens* reared on the six host plants in order from the highest to the lowest were 6.50  $\mu\text{g}/\text{mg}$   
211 on B-bean, 6.106  $\mu\text{g}/\text{mg}$  on lettuce, 4.28  $\mu\text{g}/\text{mg}$  on chive, 4.26  $\mu\text{g}/\text{mg}$  on W-cabbage, 3.42  $\mu\text{g}/\text{mg}$   
212 on pepper and 2.86  $\mu\text{g}/\text{mg}$  on cabbage. Meanwhile, significant ( $P < 0.05$ ) differences in the  
213 glycogen content of *B. cellarum* were observed when reared on lettuce, chive, cabbage, W-cabbage  
214 and pepper, and in the glycogen content of *B. impatiens* fed on chive, B-bean, cabbage, W-cabbage  
215 and pepper. In addition, there were significant ( $P < 0.05$ ) differences in the glycogen contents  
216 between *B. cellarum* and *B. impatiens* when they were fed on B-bean and pepper. Moreover, we  
217 found that *B. cellarum* and *B. impatiens* obtained higher glycogen when they were fed on chive,  
218 B-bean, lettuce and W-cabbage than when fed on cabbage and pepper.

219 **Fig 3. Glycogen content in bodies of *B. cellarum* and *B. impatiens*.** Values are the means  $\pm$   
220 standard error. Different lowercase letters indicate significant differences between two *Bradysia*  
221 species on different host plants by Tukey's HSD ( $P < 0.05$ ); while the different uppercase letters  
222 represent significant differences between two *Bradysia* species on same host plants by Tukey's  
223 HSD ( $P < 0.05$ ).

### 225 **Total fat contents in *B. cellarum* and *B. impatiens***

226 Total fat contents of *B. cellarum* and *B. impatiens* reared on six host plants are showed in  
227 Fig 4. The highest total fat content of *B. cellarum* was 8.43  $\mu\text{g}/\text{mg}$  when fed on chive. Those reared  
228 on B-bean, cabbage, pepper and W-cabbage exhibited lower total fat content of *B. cellarum* of  
229 7.67  $\mu\text{g}/\text{mg}$ , 7.00  $\mu\text{g}/\text{mg}$ , 6.66  $\mu\text{g}/\text{mg}$  and 6.42  $\mu\text{g}/\text{mg}$ , respectively. Total fat content of *B. cellarum*  
230 was the lowest (5.56  $\mu\text{g}/\text{mg}$ ) when fed on lettuce. Total fat content of *B. impatiens* reared on chive

231 was 8.64  $\mu\text{g}/\text{mg}$ , which was higher in comparison with those of *B. impatiens* fed on B-bean (7.83  
232  $\mu\text{g}/\text{mg}$ ), pepper (7.24  $\mu\text{g}/\text{mg}$ ), W-cabbage (6.99  $\mu\text{g}/\text{mg}$ ) and cabbage (6.34  $\mu\text{g}/\text{mg}$ ). Like *B.*  
233 *cellarum*, *B. impatiens* also had the lowest total fat content when reared on lettuce (5.97  $\mu\text{g}/\text{mg}$ ).  
234 In terms of the total fat contents of *B. cellarum* and *B. impatiens* reared on the same host plants,  
235 significant ( $P < 0.05$ ) differences were observed across cabbage, W-cabbage and pepper.

236 **Fig 4. Total fat content in bodies of *B. cellarum* and *B. impatiens*.** Values are the means  $\pm$   
237 standard error. Different lowercase letters indicate significant differences between two *Bradysia*  
238 species on different host plants by Tukey's HSD ( $P < 0.05$ ); while the different uppercase letters  
239 represent significant differences between two *Bradysia* species on same host plants by Tukey's  
240 HSD ( $P < 0.05$ ).

#### 241 **Neutral fat contents in *B. cellarum* and *B. impatiens***

242 Feeding on six host plants exerted influences on the neutral fat contents of *B. cellarum* and  
243 *B. impatiens* (Fig 5). We found that neutral fat content of *B. cellarum* was significantly higher  
244 when reared on chive (0.92  $\mu\text{g}/\text{mg}$ ) and B-bean (0.91  $\mu\text{g}/\text{mg}$ ) than on pepper (0.74  $\mu\text{g}/\text{mg}$ ) and  
245 cabbage (0.69  $\mu\text{g}/\text{mg}$ ). Neutral fat content of *B. cellarum* reared on lettuce was the least (0.52  
246  $\mu\text{g}/\text{mg}$ ), followed by the W-cabbage (0.55  $\mu\text{g}/\text{mg}$ ). Similar to *B. cellarum*, the neutral fat content  
247 of *B. impatiens* was higher when reared on chive and B-bean, with 0.95 and 0.84  $\mu\text{g}/\text{mg}$ ,  
248 respectively, which significantly differed from when fed on pepper (0.73  $\mu\text{g}/\text{mg}$ ), cabbage (0.64  
249  $\mu\text{g}/\text{mg}$ ), W-cabbage (0.53  $\mu\text{g}/\text{mg}$ ) and lettuce (0.50  $\mu\text{g}/\text{mg}$ ). For the neutral fat contents of *B.*  
250 *cellarum* and *B. impatiens* reared on same host plants, there was significant ( $P < 0.05$ ) difference  
251 between two species only when fed on B-bean. There was no significant difference when fed on  
252 chive, lettuce, cabbage, W-cabbage and pepper.

253 **Fig 5. Neutral fat content in bodies of *B. cellarum* and *B. impatiens*.** Values are the mean  $\pm$   
254 standard error. Different lowercase letters indicate significant differences between two *Bradysia*  
255 species on different host plants by Tukey's HSD ( $P < 0.05$ ); while the different uppercase letters  
256 represent significant differences between two *Bradysia* species on same host plants by Tukey's  
257 HSD ( $P < 0.05$ ).

## 258 Protein contents in *B. cellarum* and *B. impatiens*

259 The protein contents of *B. cellarum* were much higher when reared on B-bean (43.94  
 260  $\mu\text{g}/\text{mg}$ ) and chive (43.57  $\mu\text{g}/\text{mg}$ ), and significantly ( $P < 0.05$ ) differed from when reared on pepper  
 261 (34.67  $\mu\text{g}/\text{mg}$ ), lettuce (34.47  $\mu\text{g}/\text{mg}$ ), cabbage (29.79  $\mu\text{g}/\text{mg}$ ) and W-cabbage (28.99  $\mu\text{g}/\text{mg}$ ) (Fig  
 262 6). The protein content of *B. impatiens* was the highest when fed on B-bean (51.61  $\mu\text{g}/\text{mg}$ ) and  
 263 remarkably ( $P < 0.05$ ) differed from when reared on chive (43.02  $\mu\text{g}/\text{mg}$ ), W-cabbage (37.17  
 264  $\mu\text{g}/\text{mg}$ ), cabbage (37.02  $\mu\text{g}/\text{mg}$ ), lettuce (36.99  $\mu\text{g}/\text{mg}$ ) and pepper (29.69  $\mu\text{g}/\text{mg}$ ). In addition, we  
 265 also found that the protein contents of *B. cellarum* and *B. impatiens* reared on the same host plants  
 266 showed significant difference between two species occurred on cabbage and W-cabbage. There  
 267 was no significant differences when they were fed on chive, B-bean, lettuce and pepper.

268 **Fig 6. Protein content in bodies of *B. cellarum* and *B. impatiens*.** Values are the mean  $\pm$   
 269 standard error. Different lowercase letters indicate significant differences between two *Bradysia*  
 270 species on different host plants by Tukey's HSD ( $P < 0.05$ ); while the different uppercase letters  
 271 represent significant differences between two *Bradysia* species on same host plants by Tukey's  
 272 HSD ( $P < 0.05$ ).

## 273 Correlation analysis between host plant nutrients and body contents

### 274 in *B. cellarum* and *B. impatiens*

275 **Table 1. Correlation analysis between nutrient in host plant roots and nutrient in *B.***  
 276 ***cellarum* and *B. impatiens***

| Correlation coefficient                       |               |                    | Contents of nutrients in host plant root (mg/g) |                 |               |        |
|-----------------------------------------------|---------------|--------------------|-------------------------------------------------|-----------------|---------------|--------|
|                                               |               |                    | Protein                                         | Free amino acid | Soluble sugar | Starch |
| Nutrients in body ( $\mu\text{g}/\text{mg}$ ) | Protein       | <i>B. cellarum</i> | 1.000**                                         | 0.868*          | 0.489         | 0.808  |
|                                               | Total fat     |                    | 0.701                                           | 0.750           | 0.865*        | 0.854* |
|                                               | Neutral fat   |                    | 0.840*                                          | 0.791           | 0.648         | 0.823* |
|                                               | Soluble sugar |                    | 0.793                                           | 0.674           | 0.556         | 0.658  |
|                                               | Glycogen      |                    | 0.341                                           | 0.242           | -0.322        | 0.097  |
|                                               | Protein       |                    | <i>B. impatiens</i>                             | 0.815*          | 0.863*        | 0.381  |
|                                               | Total fat     | 0.839*             |                                                 | 0.834*          | 0.844*        | 0.800  |
|                                               | Neutral fat   | 0.840*             |                                                 | 0.764           | 0.735         | 0.784  |

|               |       |       |        |       |
|---------------|-------|-------|--------|-------|
| Soluble sugar | 0.714 | 0.778 | 0.432  | 0.762 |
| Glycogen      | 0.514 | 0.528 | -0.207 | 0.384 |

277 “\*” indicates significant correlation at the 0.05 level, “\*\*\*” indicates significant correlation at the 0.01 level.

278  
279 The protein contents in the body of *B. cellarum* were significantly positively correlated  
280 with the protein contents ( $P < 0.01$ ) and the free amino acid content ( $P < 0.05$ ) of the host plant  
281 roots, with correlation coefficients of 1.00 and 0.868, respectively (Table 1). The neutral fat  
282 content of *B. cellarum* body had a significantly ( $P < 0.05$ ) positive correlation with the free amino  
283 acid contents and the starch content of the host plant roots with correlation coefficients of 0.840  
284 and 0.823 respectively (Table 1). The total fat contents of *B. cellarum* body were significantly  
285 correlated with the contents of soluble sugars and starch. The glycogen content of *B. cellarum*  
286 body had a negative correlation with plant soluble sugar content. The starch content in the host  
287 plant roots was significantly correlated with the content of total fat and neutral fat in the insect  
288 body.

289 The contents of protein, total fat and neutral fat in the body of *B. impatiens* were all  
290 significantly positively correlated with the protein content of the host plant roots with correlation  
291 coefficients of 0.815, 0.839 and 0.840, respectively (Table 1). The contents of protein and total fat  
292 in the *B. impatiens* body was significantly ( $P < 0.05$ ) positively correlated with the free amino acid  
293 content of host plant roots with correlation coefficients of 0.863 and 0.834 respectively. The  
294 contents of protein and total fat in the body of *B. impatiens* were significantly ( $P < 0.05$ ) positively  
295 correlated with the soluble sugar in host plant roots. The glycogen content of *B. impatiens* body  
296 was negatively correlated with the soluble sugar in host plant roots. There was an extremely  
297 significant ( $P < 0.01$ ) correlation between the protein content of *B. impatiens* and the starch content  
298 in roots with a correlation coefficient of 0.907.

299

## 300 Discussion

301 In this study, we found that contents of protein and free amino acid were much higher in  
302 B-bean and chive, compared to the other four host plants. Our findings also revealed that the two  
303 *Bradysia* species obtained much more protein contents when they were reared on chive and B-  
304 bean. Furthermore, we found that the contents of protein and free amino acid in plant roots were  
305 significantly correlated with the protein contents in the body of two *Bradysia* species. It has been  
306 reported that *B. cellarum* and *B. impatiens* had a stronger adaptability with shorter developmental  
307 duration and higher oviposition, net reproductive rate and intrinsic rate value when they fed on  
308 chive and B-bean [11]. This probably could be a result of the high level of protein and free amino  
309 acid in these host plants which promote the growth, development and fecundity of the *Bradysia*  
310 species. It was reported that the western flower thrip *Frankliniella occidentalis* moved to pollen  
311 from leaves once the plants bloomed because the pollen contained higher protein than leaves [32].  
312 Therefore, we presume that the two *Bradysia* species prefer a host plant with high protein and free  
313 amino acid contents.

314 Our results revealed that the soluble sugar contents were significantly higher in chive, W-  
315 cabbage and B-bean than lettuce, cabbage and pepper. Moreover, we also found that the soluble  
316 sugar content in the body of the two *Bradysia* species especially *B. impatiens* was the highest when  
317 they were reared on the chive and B-bean. This is consistent with the report that *B. impatiens*  
318 heavily attacked chive and B-bean [13]. Other studies revealed that the soluble sugar content in  
319 crop was negatively correlated with aphid resistance. That is, the crop with higher soluble sugar  
320 content were less resistant to aphids. This was because the amount of soluble sugar positively  
321 promoted the fecundity of aphids [21, 33, 34]. A recent study reported that *B. cellarum* reared on  
322 chive had significantly longer female and male longevity, as well as higher oviposition and

323 survival rate [35]. However, our correlation analysis showed that the soluble sugars may have  
324 contributed mainly to the total fat content in the *Bradysia* species. This is consistent with the report  
325 that carbohydrate provides energy for insect growth and flight [21]. However, an interesting  
326 finding from the current study revealed that the soluble sugar content in the host plant roots were  
327 inversely correlated with the glycogen in the body of both *Bradysia* species. Glycogen is the energy  
328 storage material of insects, known as animal starch, which is used as the energy storage material  
329 for embryo development, and is correlated with the reproduction of insects [36]. It is also the  
330 essential animal version of starch and the main energy storage material in organisms [36]. There  
331 may be a trade-off between the nutrient requirement and the reproduction of the two *Bradysia*  
332 species, as the adults do not feed.

333 Our results show that the two *Bradysia* species select host plants for their higher soluble  
334 sugar content and protein content. The larvae of *B. cellarum* reared on chive had much higher  
335 soluble sugar content than those reared on B-bean. However, the larvae of *B. impatiens* reared on  
336 B-bean had much higher soluble sugar content than those reared on chive. The results also showed  
337 that *B. cellarum* obtained a higher glycogen content when they were reared on lettuce. While *B.*  
338 *impatiens* obtained it when they were reared on B-bean. These physiological differences between  
339 two *Bradysia* species is worthy of further investigation.

340 In summary, the nutrient content in an insect body is an important guarantee for their  
341 growth, development and reproduction. Our study demonstrated that there are strong correlations  
342 between host plant nutrients, especially proteins and soluble sugars, with the nutrient content in  
343 *Bradysia* species. The host plants nutrients, especially soluble sugar and soluble protein, may have  
344 strongly affected the nutrient contents of *B. cellarum* and *B. impatiens*. Since the contents of  
345 protein and free amino acid are much higher in chive and B-bean, it is proposed that rotation of

346 those two plants should be avoided in the field to control for rapid population expansion and the  
347 damage caused by *B. cellarum* and *B. impatiens*. Such strategy could cause a decrease in the  
348 continuous supply of their nutrient requirements from these host plants, which could further  
349 weaken their behaviour and performance. This approach could be a novel strategy for pest control.

350

## 351 **Acknowledgments**

352 We acknowledge Prof Jing-Jiang Zhou of Rothamsted Research, UK for critical reading  
353 and helpful suggestions of this article. We are also grateful to all editors and reviewers for handling  
354 our manuscript. We appreciate the proofreading by entomology editing.

355

## 356 **References**

- 357 1. Mohrig W, Heller K, Hippa H, Vilkkamaa P, Menzel F. Revision of black fungus gnats (Diptera: Sciaridae)  
358 of North America. *Studia Dipterologica*. 2013; 19, 141-286.
- 359 2. Ye L, Leng RX, Huang JH, Qu C, Wu H. Review of three black fungus gnat species (Diptera: Sciaridae)  
360 from greenhouses in China. *Journal of Asia-Pacific Entomology*. 2017; 20:179-184.
- 361 3. Liu Q, Gou YP, Liu CZ. Effects of different temperatures on the growth, development and fecundity of  
362 *Bradysia difformis*. *Plant Protection*. 2015; 41(05):85-87.
- 363 4. Zhu GD, Luo Y, Xue M, Zhao HP, Xia NN, Wang XH. Effects of high-temperature stress and heat shock  
364 on two root maggots, *Bradysia odoriphaga* and *Bradysia difformis* (Diptera: Sciaridae). *Journal of Asia-*  
365 *Pac Entomology*. 2018; 21(1):106-114.
- 366 5. An LN, Yang XF, Lunau K, Fan F, Li MY, Wei GS. High innate preference of black substrate in the chive  
367 gnat, *Bradysia odoriphaga* (Diptera: Sciaridae). *PloS ONE*. 2019; 14(5):e0210379.
- 368 6. Mei ZX, Wu QJ, Zang YJ, Hua L. The biology, ecology and management of *Bradysia odoriphaga*.  
369 *Entomological Knowledge*. 2003; (05):396-8.



- 370 7. Li H, Zhu F, Zhou XM, Li N, Lei CL. Bionomics and control of the root maggot, *Bradysia odoriphaga*,  
371 infested on the watermelon. Entomological Knowledge. 2007; 44(06):834-836.
- 372 8. Zhou XH, Zhang LH, Cao X, Yu Y, Zhang SC. Oviposition and feeding preference of *Bradysia odoriphaga*  
373 to different plants. Journal of Environmental Entomology. 2019; 41(03):465-470.
- 374 9. Santos A, Zanetti R, Almado RP, Serrao JE, Zanuncio JC. First report and population changes of *Bradysia*  
375 *difformis* (Diptera: Sciaridae) on Eucalyptus Nurseries in Brazil. Fla Entomology. 2012; 95(3):569-572.
- 376 10. Gou YP, Liu Q, Liu CZ. Effects of host plants on the growth, development and fecundity of *Bradysia*  
377 *difformis*. Plant Protection. 2015; 41(01):28-32.
- 378 11. Zhang YX, Guo SF, Liu CZ. Population dynamics of *Bradysia difformis* Frey on different host plants.  
379 Chinese Journal of Applied Entomology. 2016; 53(06):1184-1189.
- 380 12. Han QX, Cheng DM, Luo J, Zhou CZ, Lin QS, Xiang MM. First report of *Bradysia difformis* (Diptera:  
381 Sciaridae) damage to phalaenopsis orchid in China. Journal of Asia-Pac Entomology. 2015; 18(1):77-81.
- 382 13. Gou YP, Wang G, Quandahor P, Liu Q, Liu CZ. Effects of sex ratio on adult fecundity, longevity and egg  
383 hatchability of *Bradysia difformis* Frey at different temperatures. PloS ONE. 2019; 14(6): e0217867.
- 384 14. Zhang HR, Zhang XY, Shen DR, Zhang T, Li ZY. Study on biological characteristics of *Bradysia difformis*  
385 on edible mushrooms. Edible Fungi of China. 2008; (06):54-6.
- 386 15. Shen DR, Zhang HR, Li ZY, He SY, Zhang T. Taxonomy and dominance analysis of sciarid fly species  
387 (Dipter: Sciaridae) on edible fungi in Yunnan. Acta Entomologica Sinica. 2009; 52(08):934-940.
- 388 16. Jiang CM, Ai HM, Zhao SX. Life tables of the melon fly laboratory population reared on various host fruits.  
389 Journal of Fujian Agriculture and Forestry University (NaturalScience Edition). 2006; 35(01):24-8.
- 390 17. Lv ZX, Yu XP, Heong KL, Hu C. Nitrogen fertilizer affects herbivores and stimulates the populations of  
391 major insect pests of rice. Chinese Journal of Rice Science. 2006; 20(06):649-656.
- 392 18. Zhou FC. The correlativity between soluble carbohydrates of wheat and resistance to the bird cherryoat  
393 aphid *Rhopalosiphum padi* L. Jiangsu Agricultural Research. 1999; 20(02):60-63.
- 394 19. Li JB, Fang LP, Lv ZZ, Zhang Z. Relationships between the cotton resistance to the cotton aphid (*Aphis*  
395 *gossypii*) and the content of soluble carbohydrates. Plant Protection. 2008; 34(2): 26-30.
- 396 20. Luo JY, Cui JJ, Wang CY, Xin HJ, Zhang S, Lv LM. Relationship between the contents of protein, soluble

- 397 carbohydrate and anthocyanidins in cotton leaf and their resistance to *Apolygus lucorum* Meyer-Dür.  
398 Journal of Northwest Agricultural and Forestry University (Natural Science Edition). 2011; 39(08):75-80+89.
- 399 21. Li ZL, Wei RG, Tai AZ, Xian ZH. Relationship between the nutrition contents of host plants and the  
400 development and reproduction of *Spodoptera exigua*. Journal of Southwest Agricultural University (Natural  
401 Science Edition). 2006; 28(06):986-989.
- 402 22. Fan FX. Seasonal variation of starch content in *Dendrocalamus giganteus* and *Phyllostachys edulis* and its  
403 relationship to insect damages. Southwest Forestry University. 2010.
- 404 23. Zhang S. Elementary studies on biology characteristics and sex pheromones extracts of *Bradysia difformis*.  
405 Zhejiang Agriculture and Forestry University. 2014.
- 406 24. Shi CH, Hu JR, Li CR, Zhang YJ. Evaluation of the effectiveness of eight pesticides, and two different  
407 application methods, for controlling chive gnats. Chinese Journal of Applied Entomology. 2016;  
408 53(06):1225-1232.
- 409 25. Xu L, Zhao TH, Liu PB, Zhong T, Wang Z, Xu GQ. Olfactory behavioral responses of *Bradysia odoriphaga*.  
410 Chinese Journal of Applied Entomology. 2016; 53(06):1190-1197.
- 411 26. Dang ZH, Jia HM, Gao ZL, Pan WL. Indoor artificial breeding technology of *Bradysia odoriphaga*.  
412 Entomological Knowledge. 2000; 37(05):308-309.
- 413 27. Mu W, Liu F, Jia ZM, He MH, Xiang GF. A simple and convenient rearing technique for *Bradysia*  
414 *odoriphaga*. Entomological Journal of East China. 2003; 12(02):87-89.
- 415 28. Li RH, Liu CZ. Effects of elevated CO<sub>2</sub> concentration on nutrient contents and digestive enzyme activities  
416 in two color morphs of the pea aphid, *Acyrtosiphon pisum* (Hemiptera: Aphididae). Acta Entomologica  
417 Sinica. 2016; 59(12):1298-307.
- 418 29. Lv N, Wang L, Sang W, Liu CZ, Qiu BL. Effects of Endosymbiont Disruption on the Nutritional Dynamics  
419 of the Pea Aphid *Acyrtosiphon pisum*. Insects. 2018; 9(4).
- 420 30. Tang QY. Application of mathematical statistics in plant protection research-analysis of variance and  
421 multiple comparisons. Plant Protection Technology and Extension. 2001; 21(10):41-43.
- 422 31. Tang QY. Application of mathematical statistics in plant protection test-significance test of difference  
423 between two treatments:T- test. Plant Protection Technology and Extension. 2001; 21(09):43-45.

- 424 32. Lu W, Hou ML, Li JW. Effects of plant nutrition on the behavior and development of herbivorous insects.  
425 Annual meeting of Chinese plant protection society. Kunming, Yunnan, China. 2006.
- 426 33. Munson MA, Baumann L, Baumann P. *Buchnera aphidicola* (a prokaryotic endosymbiont of aphids)  
427 contains a putative 16S rRNA operon unlinked to the 23S rRNA-encoding gene: sequence determination,  
428 and promoter and terminator analysis. *Gene*. 1993; 137(2):171-178.
- 429 34. Kolibachuk D, Rouhbakhsh D, Baumann P. Aromatic amino acid biosynthesis in *Buchnera aphidicola*  
430 (endosymbiont of aphids): cloning and sequencing of a DNA fragment containing aroH-thrS-infC-rpmI-  
431 rplT. *Current Microbiology*. 1995; 30(5):313-316.
- 432 35. Yang YT, Shi CH, Cheng JX, Zhang YJ. Effects of feeding on different host plants on development,  
433 reproduction and protective enzymes of *Bradysia odoriphaga*. *Plant Protection*. 2017; 43(5):119-123.
- 434 36. Zhu GD, Luo Y, Xue M, Zhao HP, Sun X, Wang XH. Effects of feeding on different host plants and diets  
435 on *Bradysia odoriphaga* population parameters and tolerance to heat and insecticides. *Journal of Economic*  
436 *Entomology*. 2017; 110(6):2371-2380.
- 437

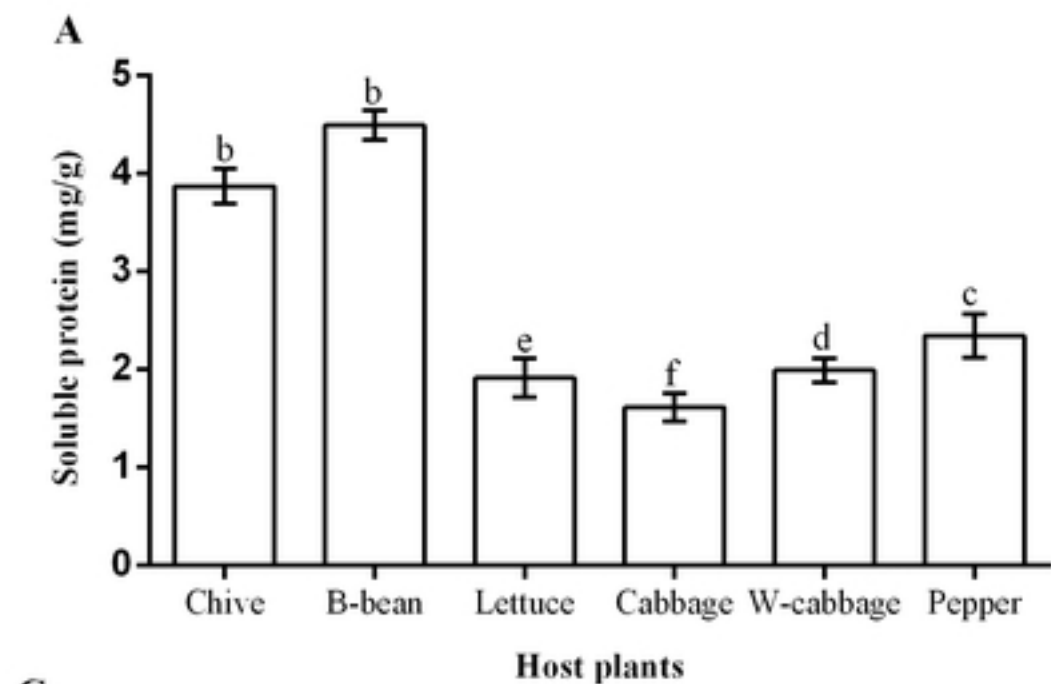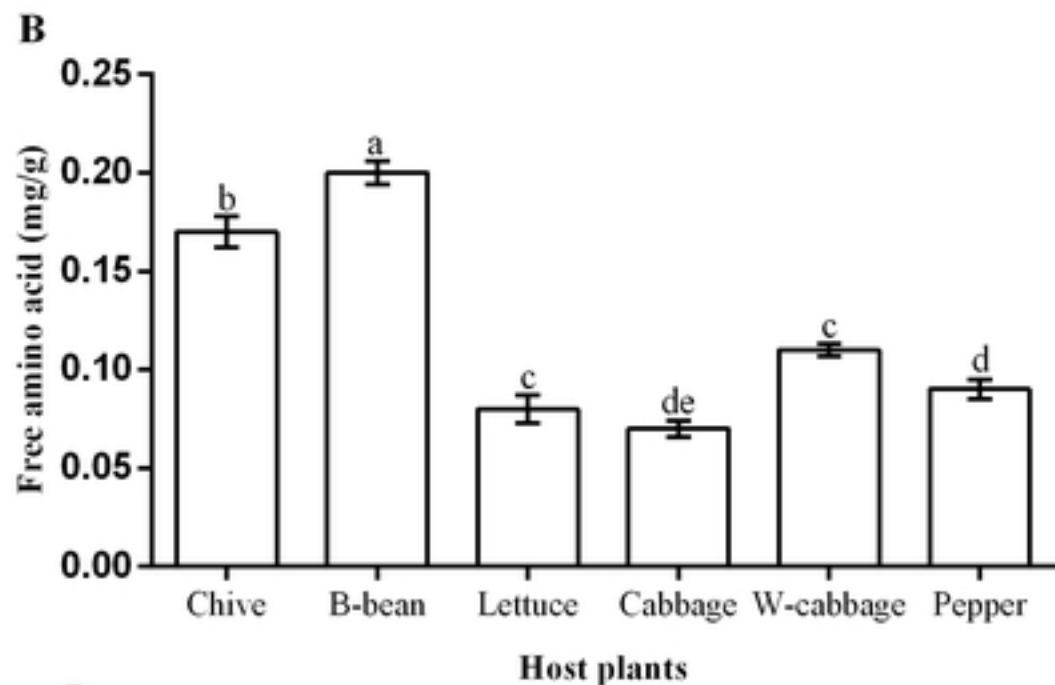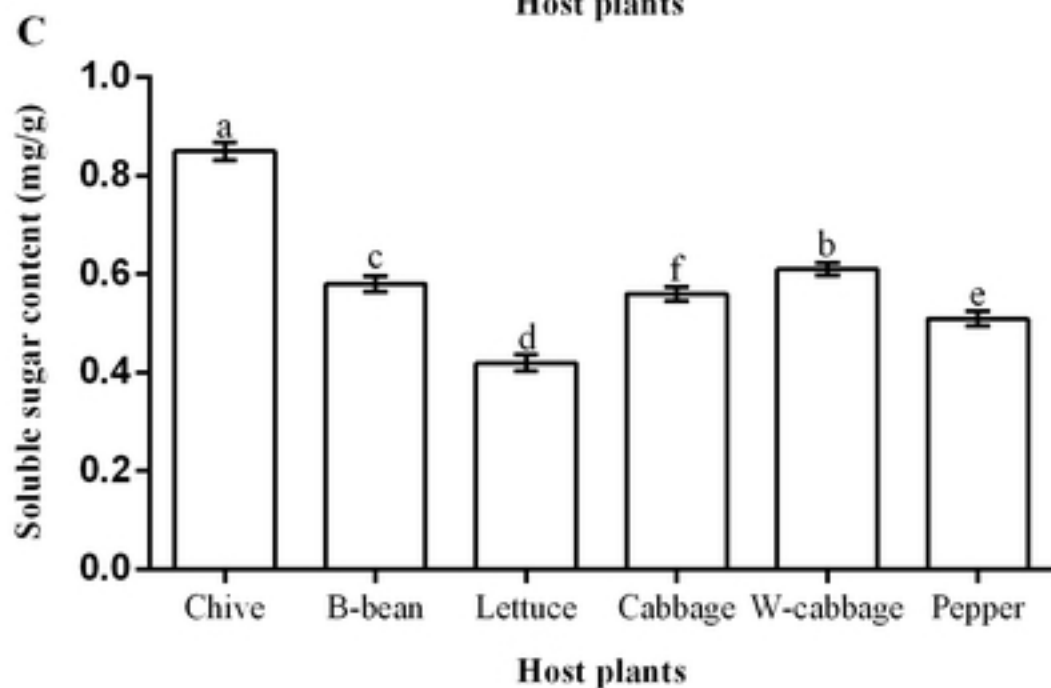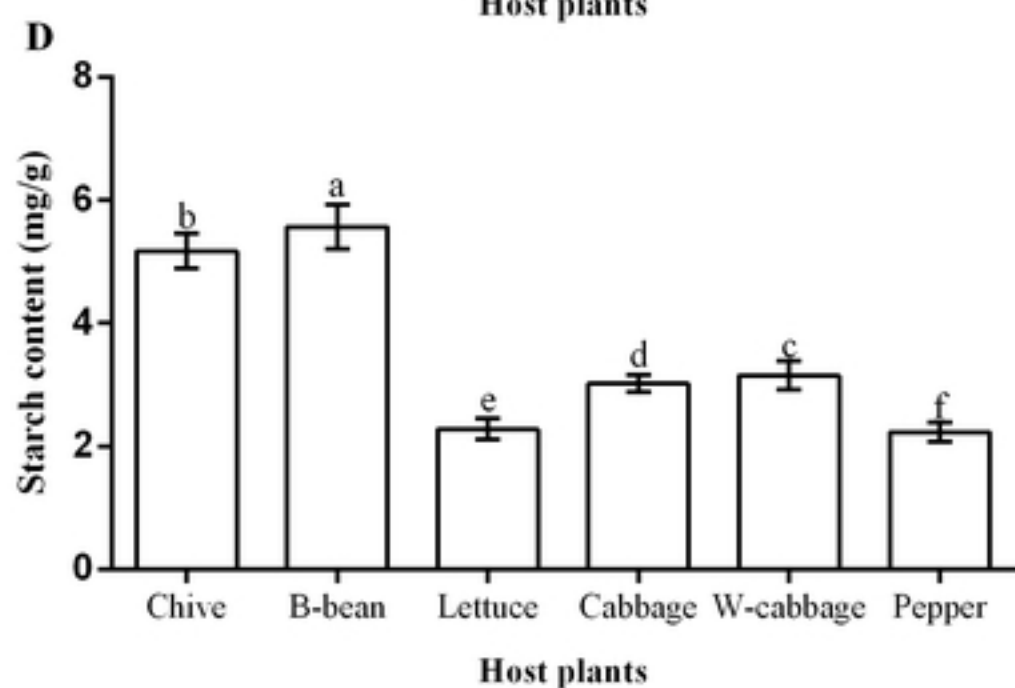

Nutrient content in roots of host plants

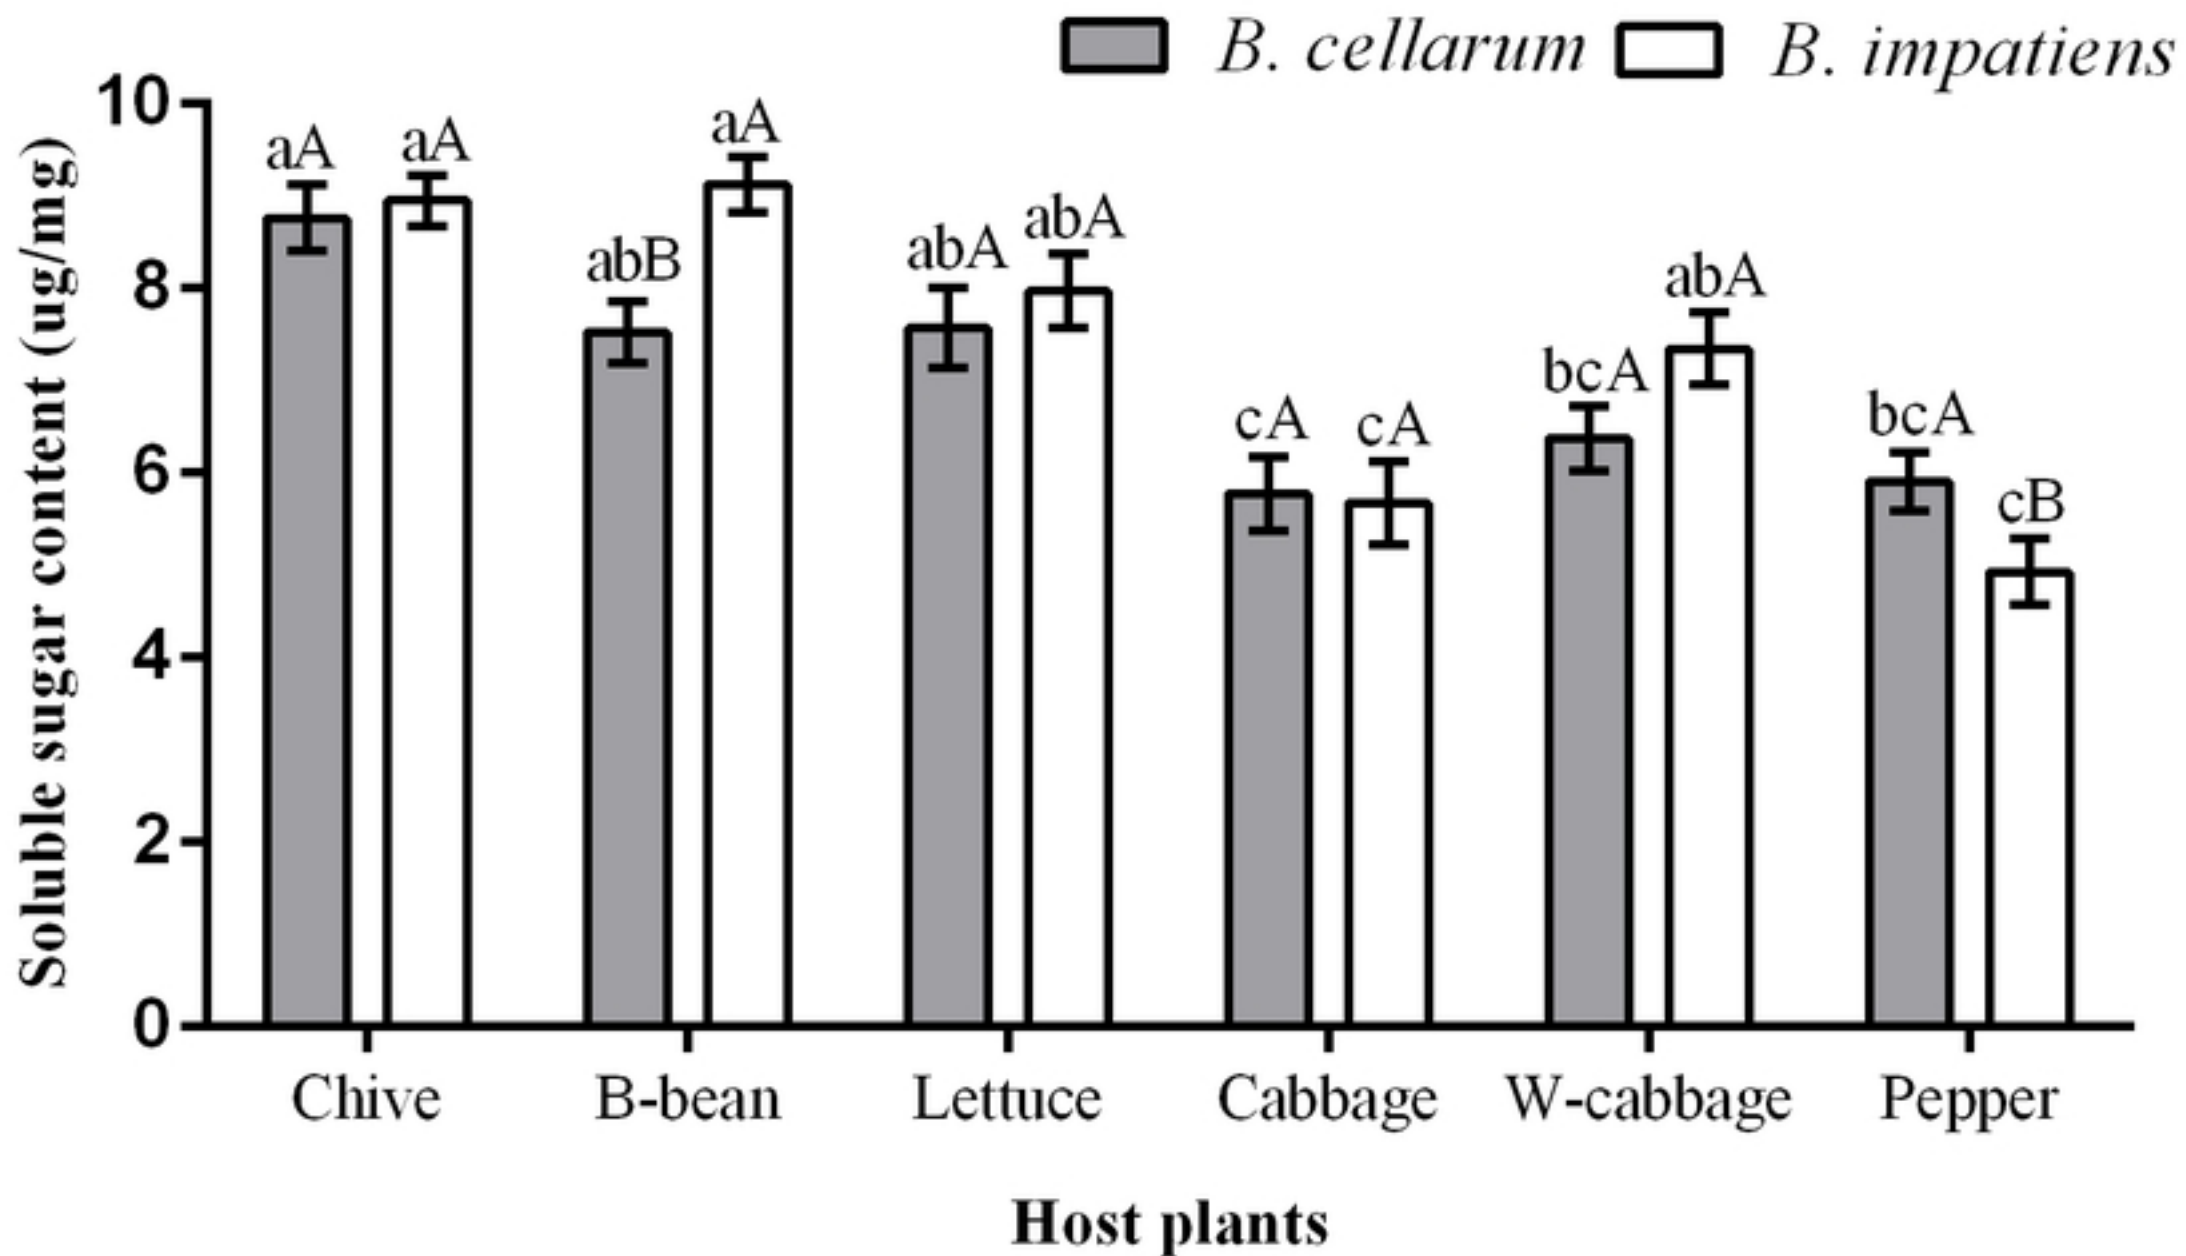

Soluble sugar content in bodies of *B. cellarum* and *B. impatiens*

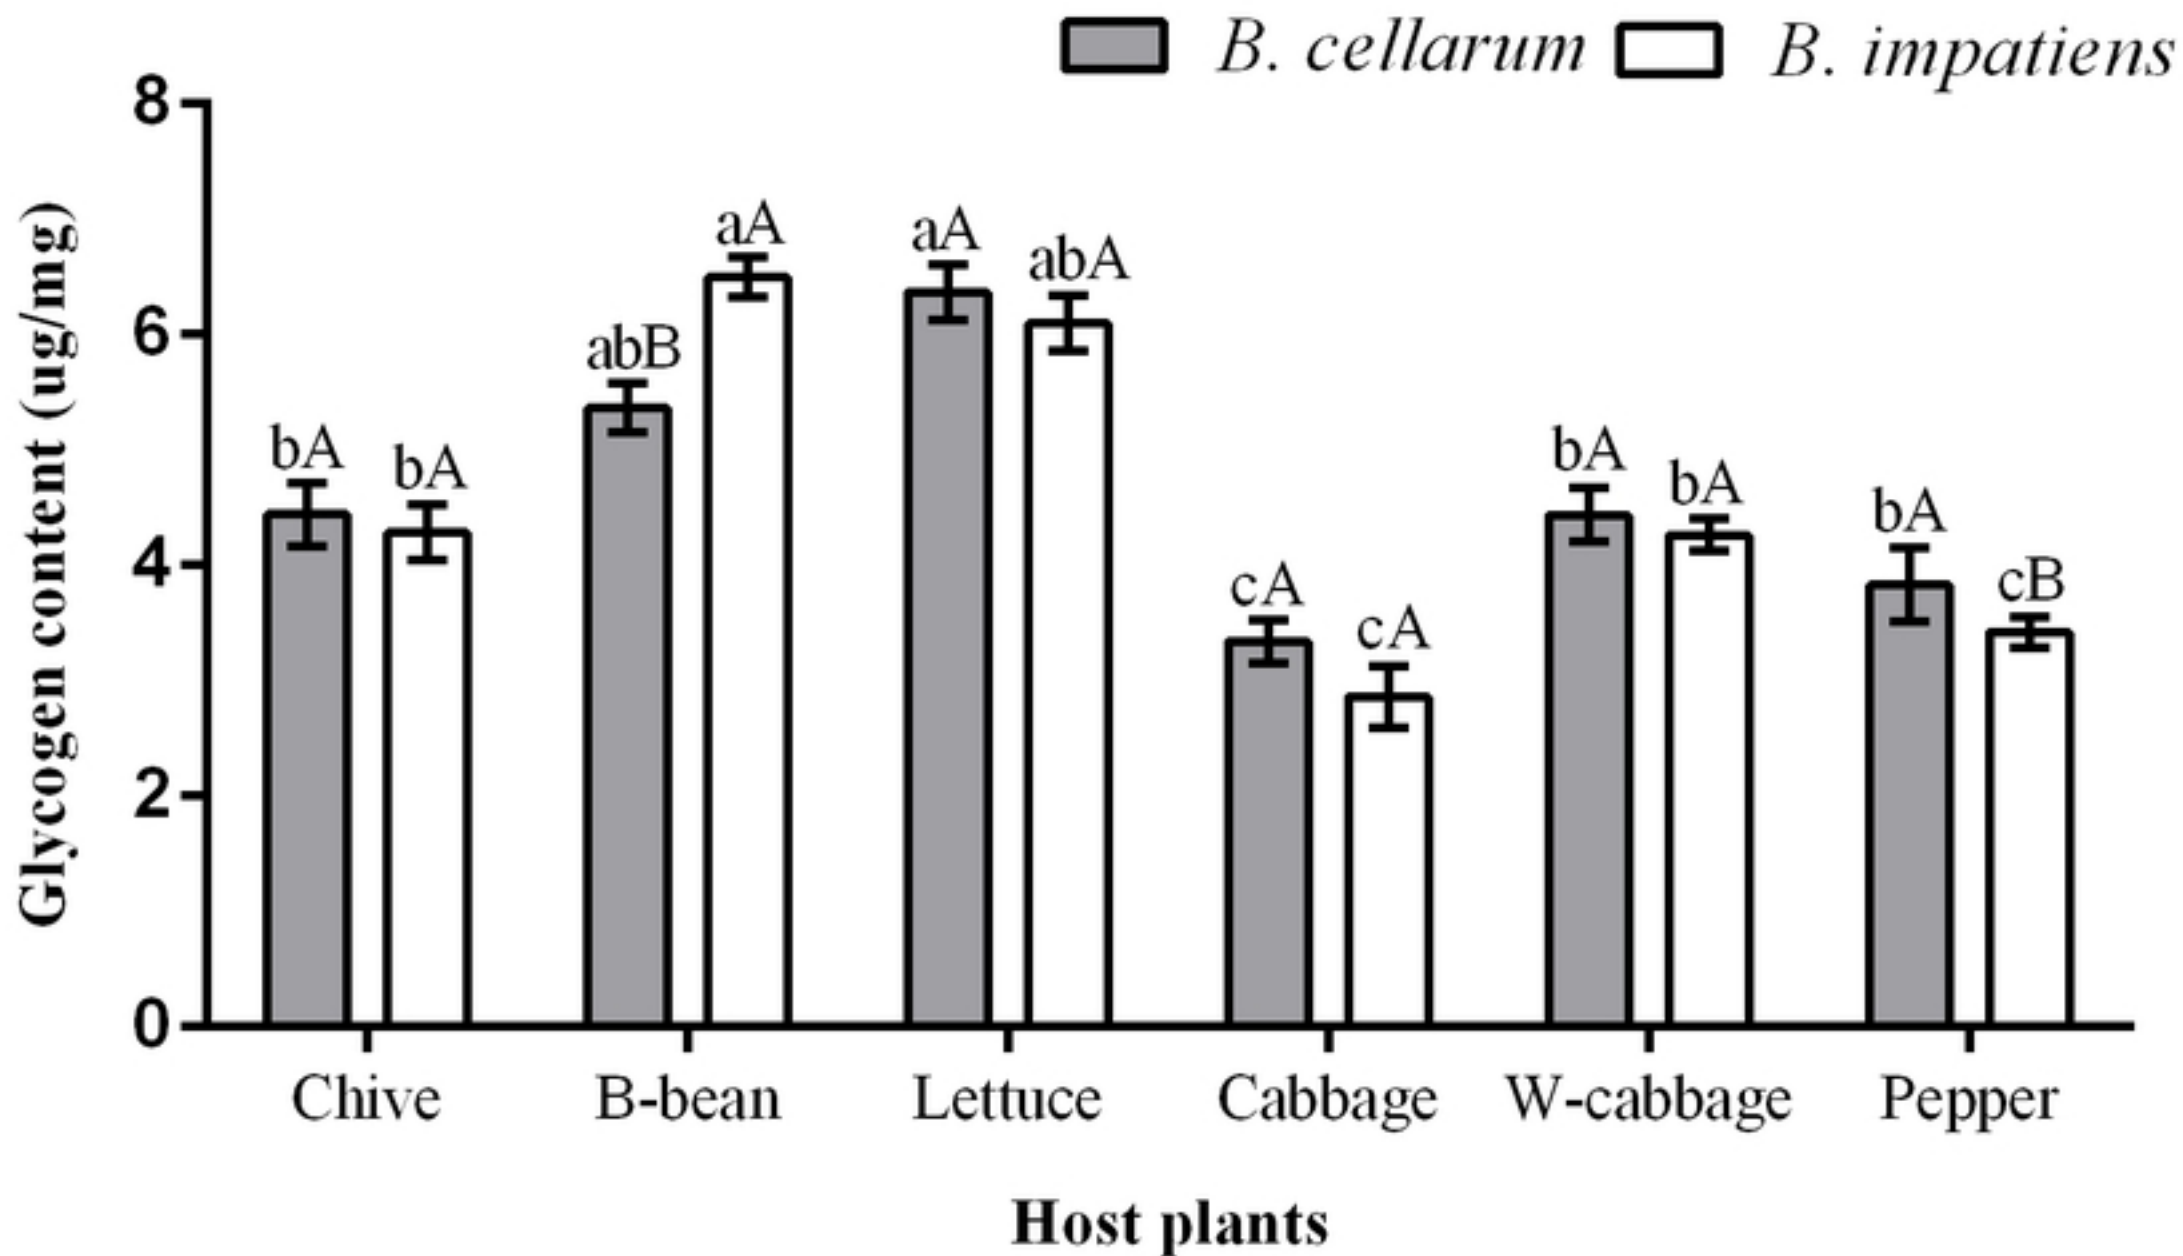

Glycogen content in bodies of *B. cellarum* and *B. impatiens*

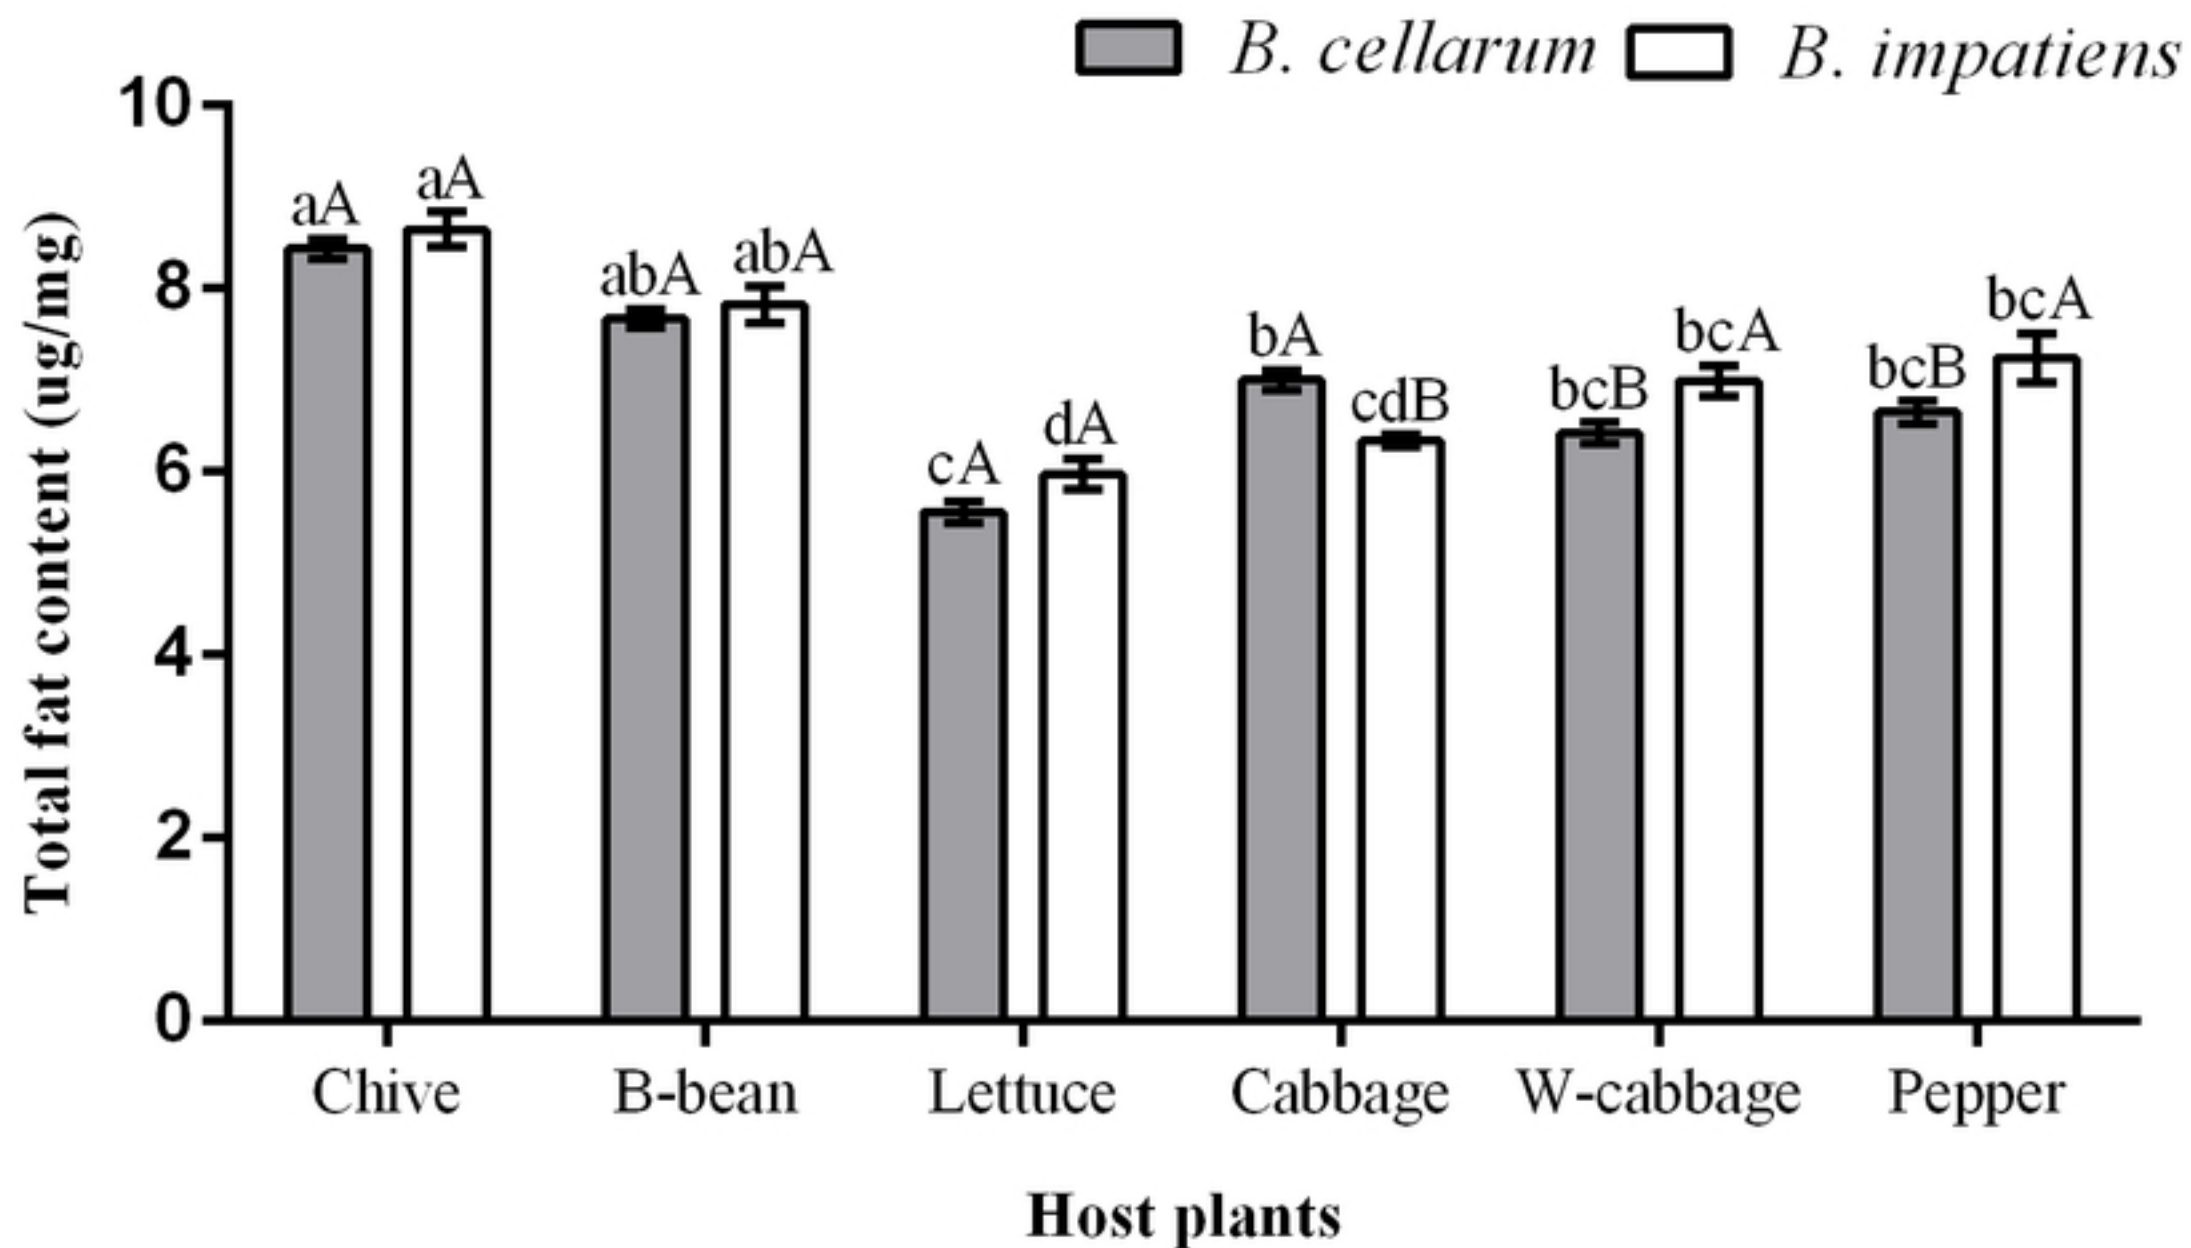

Total fat content in bodies of *B. cellarum* and *B. impatiens*

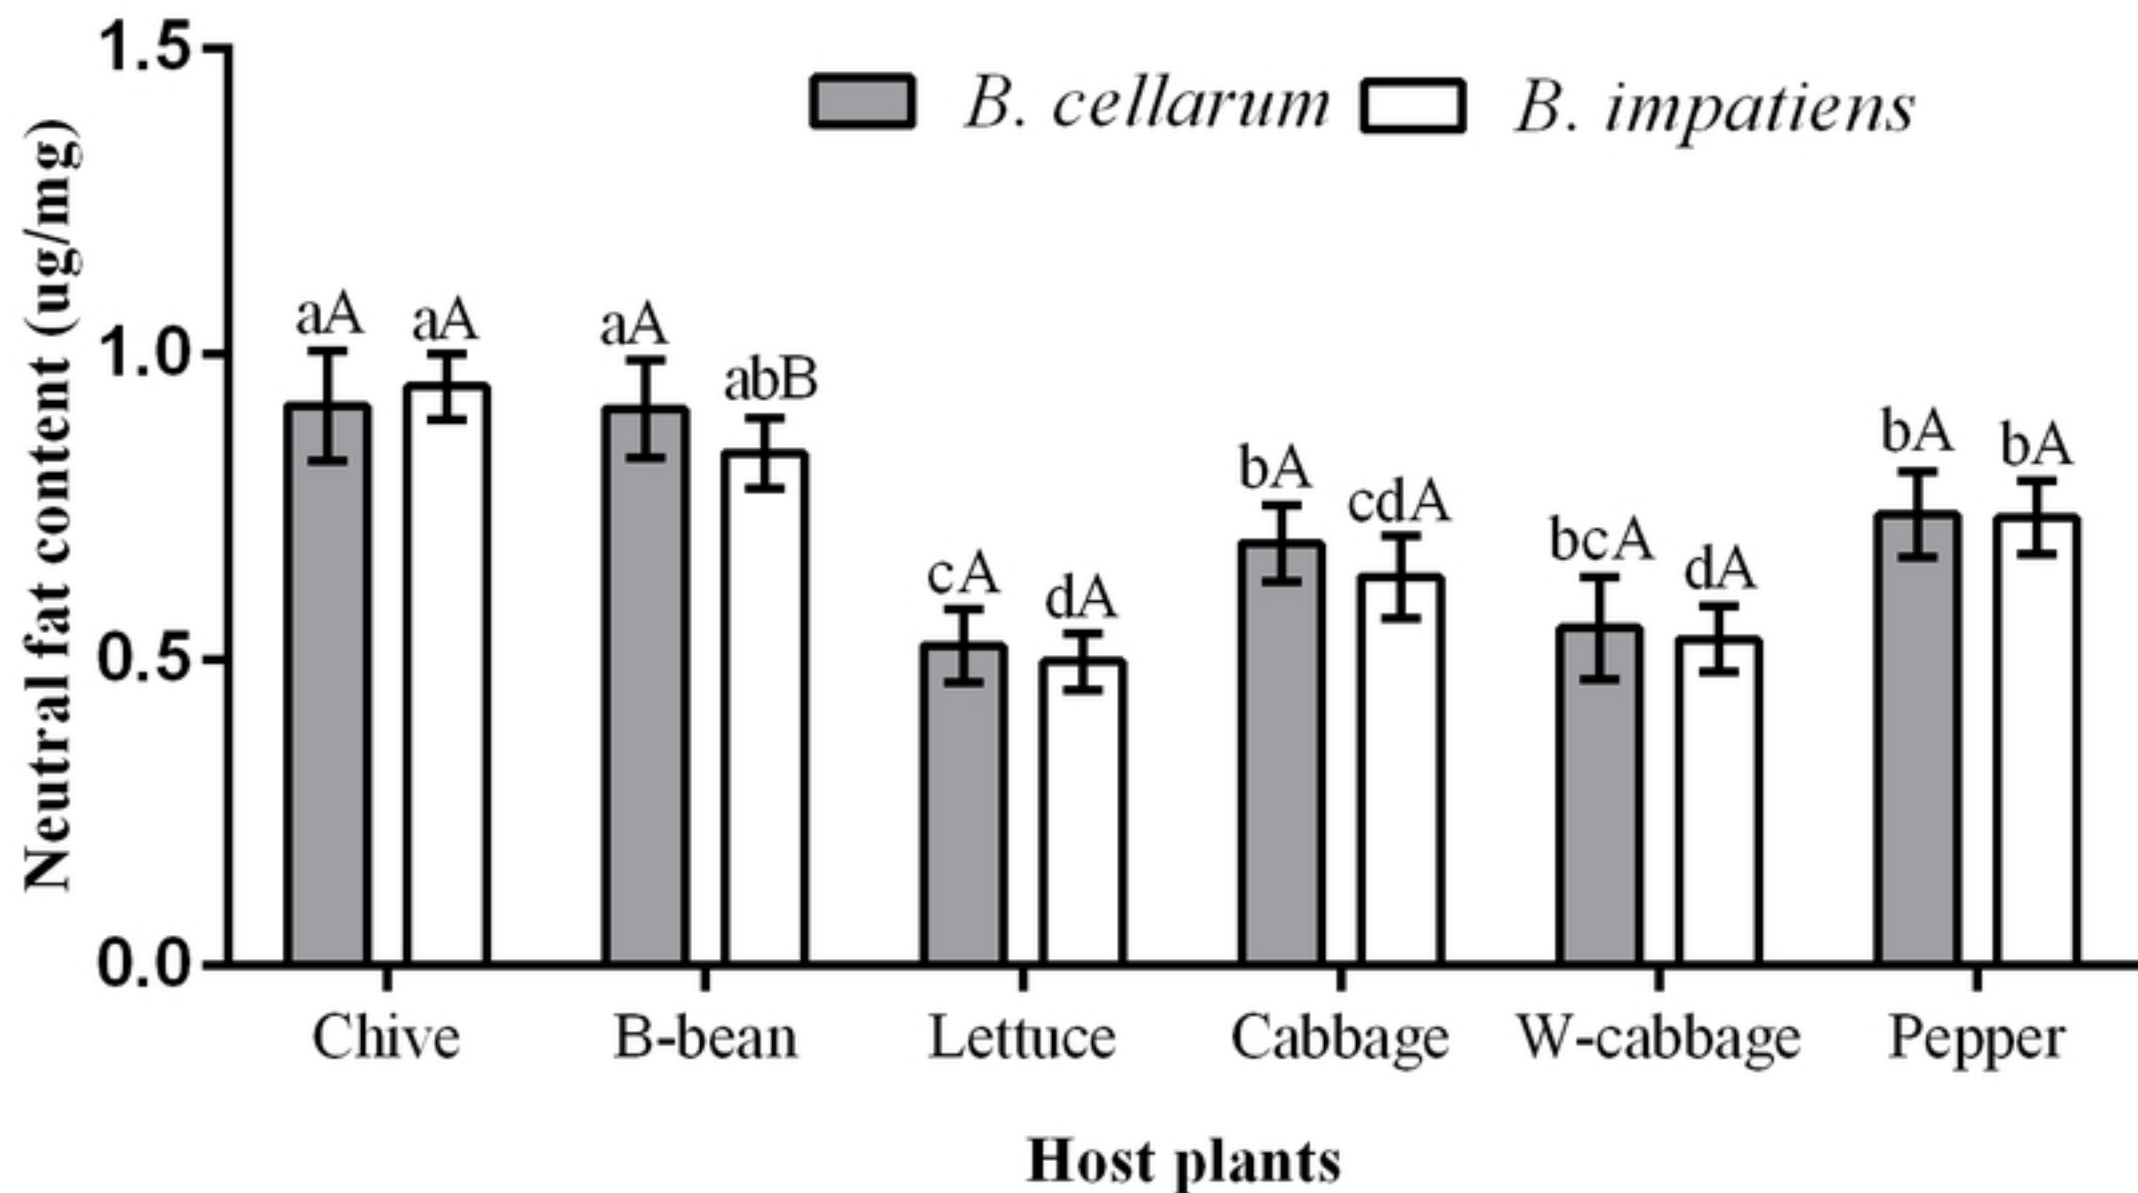

Neutral fat content in bodies of *B. cellarum* and *B. impatiens*



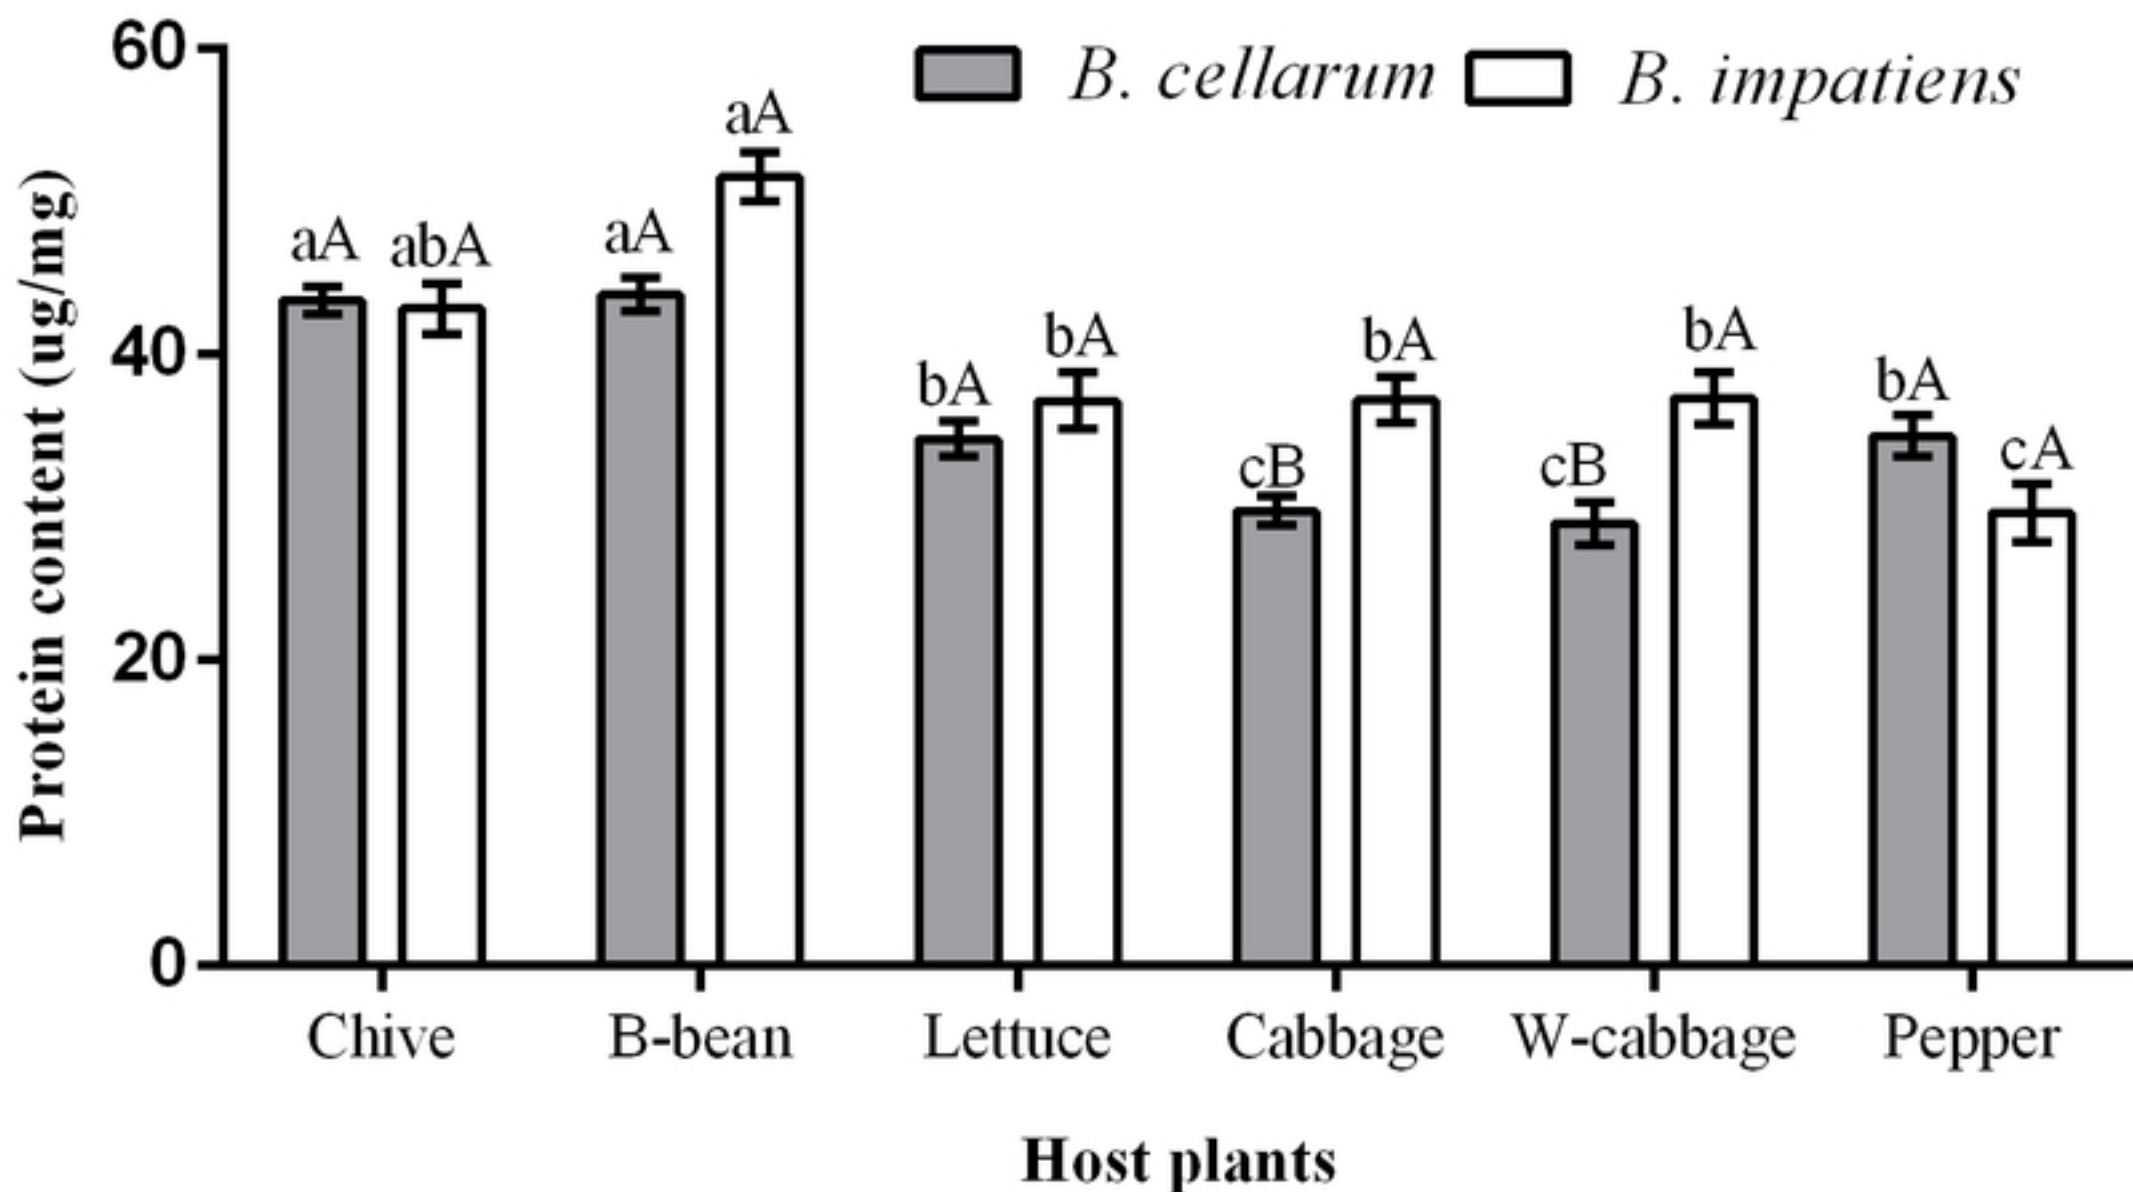

Protein content in bodies of *B. cellarum* and *B. impatiens*
